# Supplementary material for: Long-term Fertilization Structures Bacterial and Archaeal Communities along Soil Depth Gradient in a Paddy Soil
Source: PubMed Central journal article supplement (PMC5559540; doi:10.3389/fmicb.2017.01516), 2017-08-15
Supplement: Image_1.pdf [file Image_1.pdf]

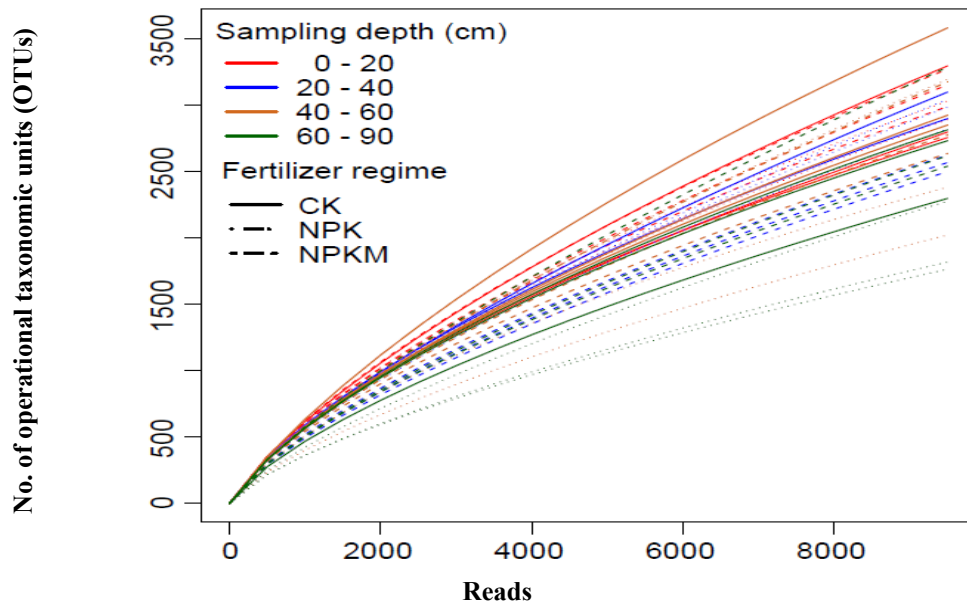

**Figure S1.** Rarefaction curves (cutoff 0.03) of the soil microbiota within the whole soil profile (0-90 cm) under different long-term fertilizer treatments.
