# Supplementary material for: Long-term Fertilization Structures Bacterial and Archaeal Communities along Soil Depth Gradient in a Paddy Soil
Source: PubMed Central journal article supplement (PMC5559540; doi:10.3389/fmicb.2017.01516), 2017-08-15
Supplement: Image_2.pdf [file Image_2.pdf]

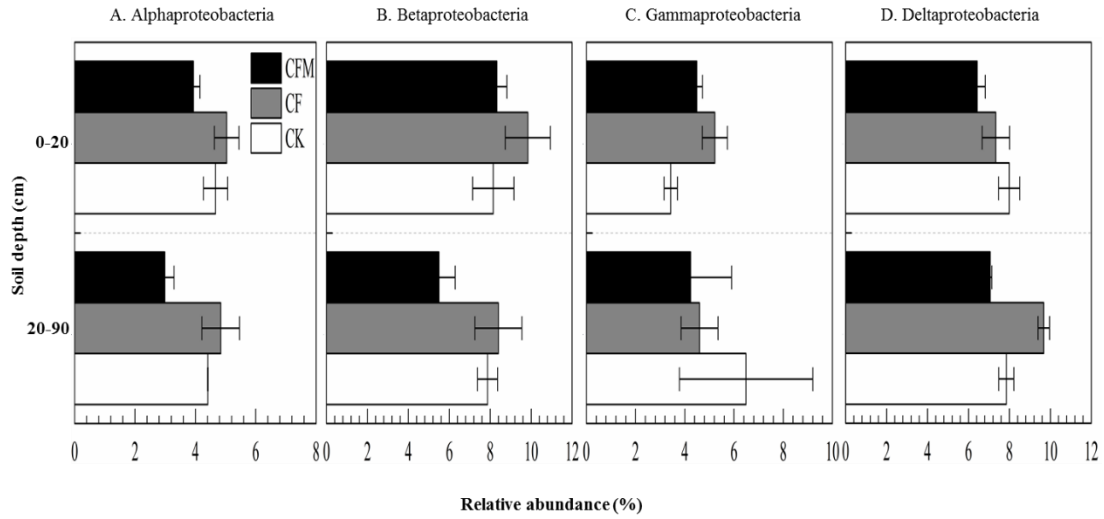

**Figure S2.** Relative abundances of *Alphaproteobacteria* (A), *Betaproteobacteria* (B), *Gammaproteobacteria* (C) and *Deltaproteobacteria* (D) at 0-20 and 20-90 cm depths under different long-term fertilizer treatments. Values at 20-90 cm depths are weighted means. CK: no fertilizer; CF: NPK fertilizer; CFM: NPK fertilizer combined with farmyard manure. Error bars represent the standard error of the mean.
