# Supplementary material for: Long-term Fertilization Structures Bacterial and Archaeal Communities along Soil Depth Gradient in a Paddy Soil
Source: PubMed Central journal article supplement (PMC5559540; doi:10.3389/fmicb.2017.01516), 2017-08-15
Supplement: Image_4.pdf [file Image_4.pdf]

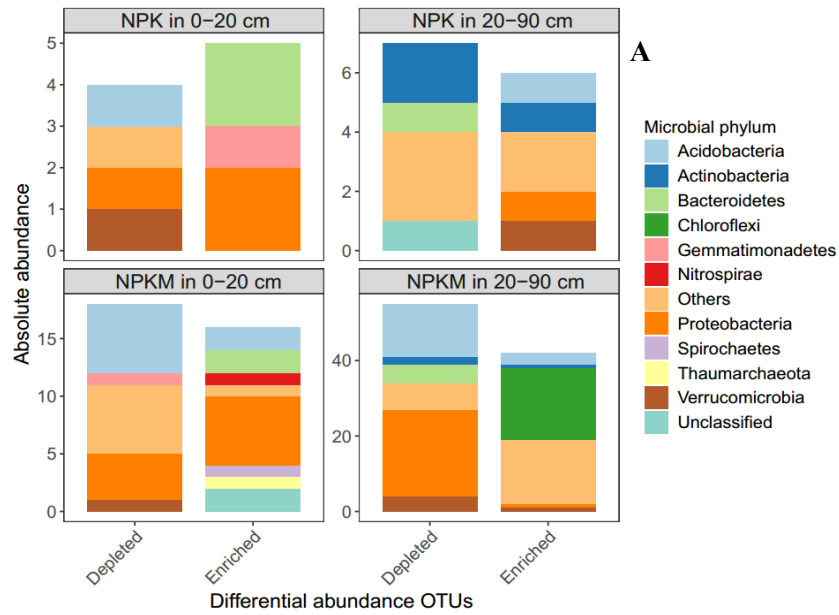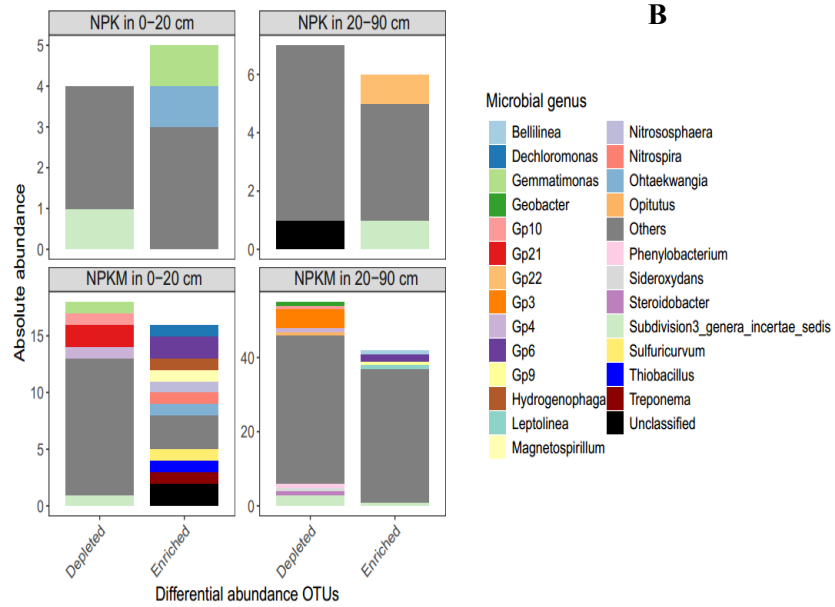

**Figure S4.** The absolute abundance of differentially abundant OTUs at both phylum (A) and genus (B) level at 0-20 and 20-90 cm depths under different long term fertilizer treatments.
