# Supplementary material for: Long-term Fertilization Structures Bacterial and Archaeal Communities along Soil Depth Gradient in a Paddy Soil
Source: PubMed Central journal article supplement (PMC5559540; doi:10.3389/fmicb.2017.01516), 2017-08-15
Supplement: Image_6.pdf [file Image_6.pdf]

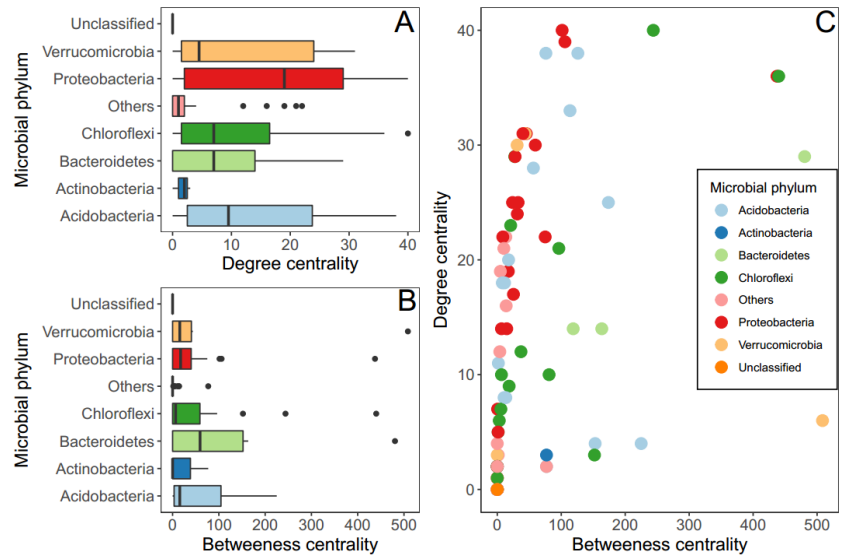

**Figure S6.** The degree and betweenness centrality of correlation network of subsoils (20-90 cm).
