# Supplementary material for: Long-term Fertilization Structures Bacterial and Archaeal Communities along Soil Depth Gradient in a Paddy Soil
Source: Front Microbiol. 2017 Aug 15;8:1516. doi: 10.3389/fmicb.2017.01516 (PMC5559540; doi:10.3389/fmicb.2017.01516)
Supplement: Supplementary file 1 [file Data_Sheet_1.xlsx]

## Sheet: Supplementary Data Sheet S1
	Taxa	count	type	facet_type.p
1	Acidobacteria	1	Depleted	NPK in 0-20 cm
2	Others	1	Depleted	NPK in 0-20 cm
3	Proteobacteria	1	Depleted	NPK in 0-20 cm
4	Verrucomicrobia	1	Depleted	NPK in 0-20 cm
5	Bacteroidetes	2	Enriched	NPK in 0-20 cm
6	Gemmatimonadetes	1	Enriched	NPK in 0-20 cm
7	Proteobacteria	2	Enriched	NPK in 0-20 cm
8	Actinobacteria	2	Depleted	NPK in 20-90 cm
9	Bacteroidetes	1	Depleted	NPK in 20-90 cm
10	Others	3	Depleted	NPK in 20-90 cm
11	Unclassified	1	Depleted	NPK in 20-90 cm
12	Acidobacteria	1	Enriched	NPK in 20-90 cm
13	Actinobacteria	1	Enriched	NPK in 20-90 cm
14	Others	2	Enriched	NPK in 20-90 cm
15	Proteobacteria	1	Enriched	NPK in 20-90 cm
16	Verrucomicrobia	1	Enriched	NPK in 20-90 cm
17	Acidobacteria	6	Depleted	NPKM in 0-20 cm
18	Gemmatimonadetes	1	Depleted	NPKM in 0-20 cm
19	Others	6	Depleted	NPKM in 0-20 cm
20	Proteobacteria	4	Depleted	NPKM in 0-20 cm
21	Verrucomicrobia	1	Depleted	NPKM in 0-20 cm
22	Acidobacteria	2	Enriched	NPKM in 0-20 cm
23	Bacteroidetes	2	Enriched	NPKM in 0-20 cm
24	Nitrospirae	1	Enriched	NPKM in 0-20 cm
25	Others	1	Enriched	NPKM in 0-20 cm
26	Proteobacteria	6	Enriched	NPKM in 0-20 cm
27	Spirochaetes	1	Enriched	NPKM in 0-20 cm
28	Thaumarchaeota	1	Enriched	NPKM in 0-20 cm
29	Unclassified	2	Enriched	NPKM in 0-20 cm
30	Acidobacteria	14	Depleted	NPKM in 20-90 cm
31	Actinobacteria	2	Depleted	NPKM in 20-90 cm
32	Bacteroidetes	5	Depleted	NPKM in 20-90 cm
33	Others	7	Depleted	NPKM in 20-90 cm
34	Proteobacteria	23	Depleted	NPKM in 20-90 cm
35	Verrucomicrobia	4	Depleted	NPKM in 20-90 cm
36	Acidobacteria	3	Enriched	NPKM in 20-90 cm
37	Actinobacteria	1	Enriched	NPKM in 20-90 cm
38	Chloroflexi	19	Enriched	NPKM in 20-90 cm
39	Others	17	Enriched	NPKM in 20-90 cm
40	Proteobacteria	1	Enriched	NPKM in 20-90 cm
41	Verrucomicrobia	1	Enriched	NPKM in 20-90 cm
