# Supplementary material for: Long-term Fertilization Structures Bacterial and Archaeal Communities along Soil Depth Gradient in a Paddy Soil
Source: Front Microbiol. 2017 Aug 15;8:1516. doi: 10.3389/fmicb.2017.01516 (PMC5559540; doi:10.3389/fmicb.2017.01516)
Supplement: Supplementary file 2 [file Data_Sheet_2.xlsx]

## Sheet: All the significantly Different
	Taxa	count	type	facet_type.g
1	Others	3	Depleted	NPK in 0-20 cm
2	Subdivision3_genera_incertae_sedis	1	Depleted	NPK in 0-20 cm
3	Gemmatimonas	1	Enriched	NPK in 0-20 cm
4	Ohtaekwangia	1	Enriched	NPK in 0-20 cm
5	Others	3	Enriched	NPK in 0-20 cm
6	Others	6	Depleted	NPK in 20-90 cm
7	Unclassified	1	Depleted	NPK in 20-90 cm
8	Gp22	1	Enriched	NPK in 20-90 cm
9	Others	4	Enriched	NPK in 20-90 cm
10	Subdivision3_genera_incertae_sedis	1	Enriched	NPK in 20-90 cm
11	Gemmatimonas	1	Depleted	NPKM in 0-20 cm
12	Gp10	1	Depleted	NPKM in 0-20 cm
13	Gp21	2	Depleted	NPKM in 0-20 cm
14	Gp4	1	Depleted	NPKM in 0-20 cm
15	Others	12	Depleted	NPKM in 0-20 cm
16	Subdivision3_genera_incertae_sedis	1	Depleted	NPKM in 0-20 cm
17	Dechloromonas	1	Enriched	NPKM in 0-20 cm
18	Gp6	2	Enriched	NPKM in 0-20 cm
19	Hydrogenophaga	1	Enriched	NPKM in 0-20 cm
20	Magnetospirillum	1	Enriched	NPKM in 0-20 cm
21	Nitrososphaera	1	Enriched	NPKM in 0-20 cm
22	Nitrospira	1	Enriched	NPKM in 0-20 cm
23	Ohtaekwangia	1	Enriched	NPKM in 0-20 cm
24	Others	3	Enriched	NPKM in 0-20 cm
25	Sulfuricurvum	1	Enriched	NPKM in 0-20 cm
26	Thiobacillus	1	Enriched	NPKM in 0-20 cm
27	Treponema	1	Enriched	NPKM in 0-20 cm
28	Unclassified	2	Enriched	NPKM in 0-20 cm
29	Geobacter	1	Depleted	NPKM in 20-90 cm
30	Gp10	1	Depleted	NPKM in 20-90 cm
31	Gp3	5	Depleted	NPKM in 20-90 cm
32	Gp4	1	Depleted	NPKM in 20-90 cm
33	Opitutus	1	Depleted	NPKM in 20-90 cm
34	Others	40	Depleted	NPKM in 20-90 cm
35	Phenylobacterium	1	Depleted	NPKM in 20-90 cm
36	Sideroxydans	1	Depleted	NPKM in 20-90 cm
37	Steroidobacter	1	Depleted	NPKM in 20-90 cm
38	Subdivision3_genera_incertae_sedis	3	Depleted	NPKM in 20-90 cm
39	Bellilinea	1	Enriched	NPKM in 20-90 cm
40	Gp6	2	Enriched	NPKM in 20-90 cm
41	Gp9	1	Enriched	NPKM in 20-90 cm
42	Leptolinea	1	Enriched	NPKM in 20-90 cm
43	Others	36	Enriched	NPKM in 20-90 cm
44	Subdivision3_genera_incertae_sedis	1	Enriched	NPKM in 20-90 cm
